# Supplementary material for: Single-molecule live-cell imaging visualizes parallel pathways of prokaryotic nucleotide excision repair
Source: PubMed Central journal article supplement (PMC7083872; doi:10.1038/s41467-020-15179-y), 2020-03-20
Supplement: 41467_2020_15179_MOESM1_ESM.pdf [file 41467_2020_15179_MOESM1_ESM.pdf]

## Supplementary Information file

**Single-molecule live-cell imaging visualizes parallel pathways of prokaryotic nucleotide excision repair**

**Harshad Ghodke<sup>1,2</sup>, Han Ngoc Ho<sup>1,2</sup>, Antoine M van Oijen<sup>1,2</sup>**

<sup>1</sup>Molecular Horizons and School of Chemistry and Molecular Bioscience, University of Wollongong, Wollongong, New South Wales, 2522, Australia

<sup>2</sup> Illawarra Health and Medical Research Institute, Wollongong, New South Wales, 2522, Australia

**Correspondence and requests for materials should be addressed to H.G.** (email: harshad@uow.edu.au)

**This PDF file includes:**

- Supplementary Figures 1 - 7
- Supplementary Tables 1 - 4
- Supplementary Notes 1 - 2
- Supplementary References

## Supplementary Figures

### Supplementary Figure 1:

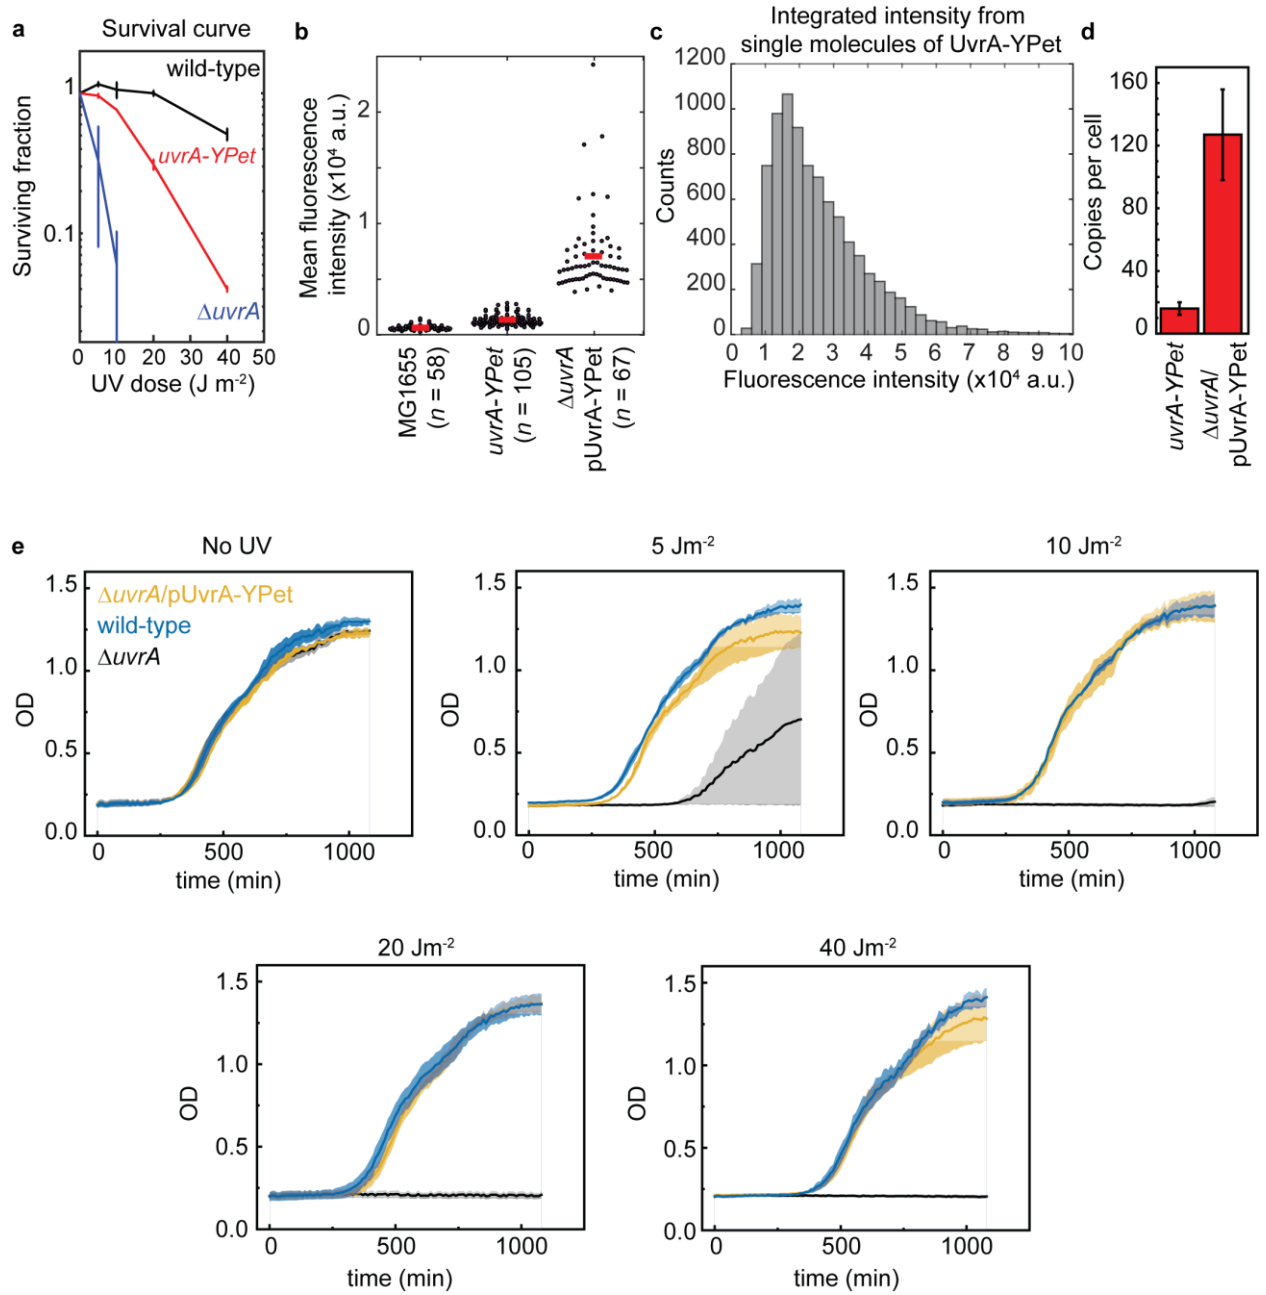

**Supplementary Figure 1:**

a. Survival assay showing survival of wild-type (black), *uvrA-YPet* (red) and  $\Delta uvrA$  (blue) cells upon exposure to  $20 \text{ Jm}^{-2}$  of 254-nm UV light. Error bars represent standard error of the mean from two independent experiments, each experiment involved three technical replicates.

b. Mean fluorescence intensity of wild-type MG1655, *uvrA-YPet* cells and cells carrying a low-copy plasmid expressing UvrA-YPet upon excitation with 514-nm light. Red line indicates mean of the distribution.  $n$ , number of cells.

c. Histogram of integrated fluorescence intensities of single UvrA-YPet foci in *uvrA-YPet* cells upon excitation with 514-nm light.

d. Bar plots show mean copy number of UvrA-YPet measured in *uvrA-YPet* cells ( $n = 105$  cells) and  $\Delta uvrA/pUvrA-YPet$  cells ( $n = 67$  cells). Error bars are standard deviations.

e. Growth curves (OD 600 nm; LB medium 30°C in a 96-well plate) of UV irradiated (0, 5, 10, 20 and  $40 \text{ Jm}^{-2}$  of UVC radiation) of the  $\Delta uvrA/pUvrA-YPet$  strain (yellow line) compared to  $\Delta uvrA/pJM1071$  (empty vector; black line) and wild-type cells carrying the pJM1071 vector (blue line) reveal that UvrA-YPet expressed from the plasmid complements a  $\Delta uvrA$  phenotype. Solid lines represent average of two biological replicates, each performed in triplicate. Shaded areas represent standard error of mean of two biological replicates.

Source data are provided as a Source Data file.

**Supplementary Figure 2:**

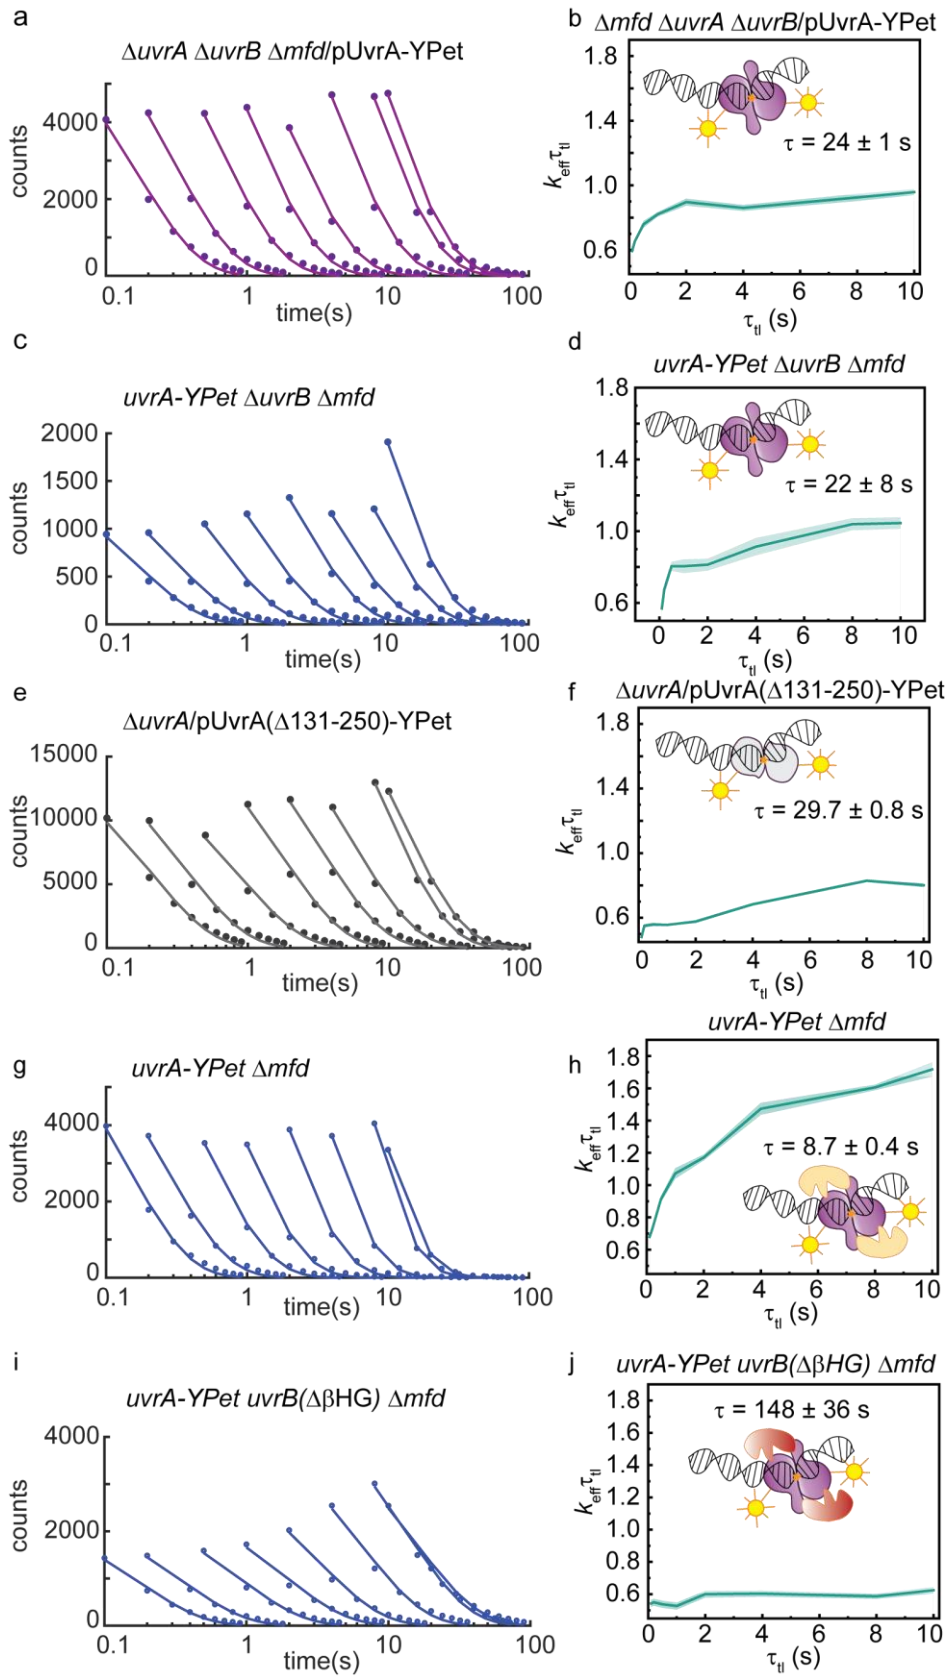

### Supplementary Figure 2:

a. Cumulative residence time distributions (CRTDs, circles) obtained from interval imaging of UvrA-YPet in  $\Delta uvrA \Delta uvrB \Delta mfd$  cells. Lines are mono-exponential fits to CRTDs.

b. The  $k_{\text{eff}} \tau_{\text{tl}}$  plot obtained from fitting CRTDs of UvrA-YPet in  $\Delta uvrA \Delta uvrB \Delta mfd$  cells. Shaded error bands are standard deviations from ten bootstrapped samples. Cartoon (inset) illustrates UvrA-YPet (purple) in complex with DNA.

c. Cumulative residence time distributions (CRTDs, circles) obtained from interval imaging of UvrA-YPet in  $uvrA\text{-YPet} \Delta uvrB \Delta mfd$  cells. Lines are mono-exponential fits to CRTDs.

d. The  $k_{\text{eff}} \tau_{\text{tl}}$  plot obtained from fitting CRTDs of UvrA-YPet in  $uvrA\text{-YPet} \Delta uvrB \Delta mfd$  cells. Shaded error bands are standard deviations from ten bootstrapped samples. Cartoon (inset) illustrates UvrA-YPet (purple) in complex with DNA.

e. CRTDs (circles) obtained from interval imaging of UvrA( $\Delta 131\text{-}250$ )-YPet in  $\Delta uvrA$  cells. Lines are mono-exponential fits to CRTDs.

f. The  $k_{\text{eff}} \tau_{\text{tl}}$  plot obtained from fitting CRTDs of UvrA( $\Delta 131\text{-}250$ )-YPet in  $\Delta uvrA$  cells. Shaded error bands are standard deviations from ten bootstrapped samples. Cartoon (inset) illustrates UvrA( $\Delta 131\text{-}250$ )-YPet (grey) in complex with DNA.

g. CRTDs (circles) obtained from interval imaging of UvrA-YPet in  $uvrA\text{-YPet} \Delta mfd$  cells. Lines are mono-exponential fits to CRTDs.

h. The  $k_{\text{eff}} \tau_{\text{tl}}$  plot obtained from fitting CRTDs of UvrA-YPet in  $uvrA\text{-YPet} \Delta mfd$  cells. Shaded error bands are standard deviations from ten bootstrapped samples. Cartoon (inset) illustrates the complex formed by UvrA-YPet (purple) and UvrB (orange) with DNA.

i. CRTDs (circles) obtained from interval imaging of UvrA-YPet in  $uvrA\text{-YPet} uvrB(\Delta\beta HG) \Delta mfd$  cells. Lines are mono-exponential fits to CRTDs.

j. The  $k_{\text{eff}} \tau_{\text{tl}}$  plot obtained from fitting CRTDs of UvrA-YPet in  $uvrA\text{-YPet} uvrB(\Delta\beta HG) \Delta mfd$  cells. Shaded error bands are standard deviations from ten bootstrapped samples. Cartoon (inset) illustrates the complex formed by UvrA-YPet (purple) and UvrB( $\Delta\beta HG$ ) (red) with DNA. Source data are provided as a Source Data file.

### Supplementary Figure 3:

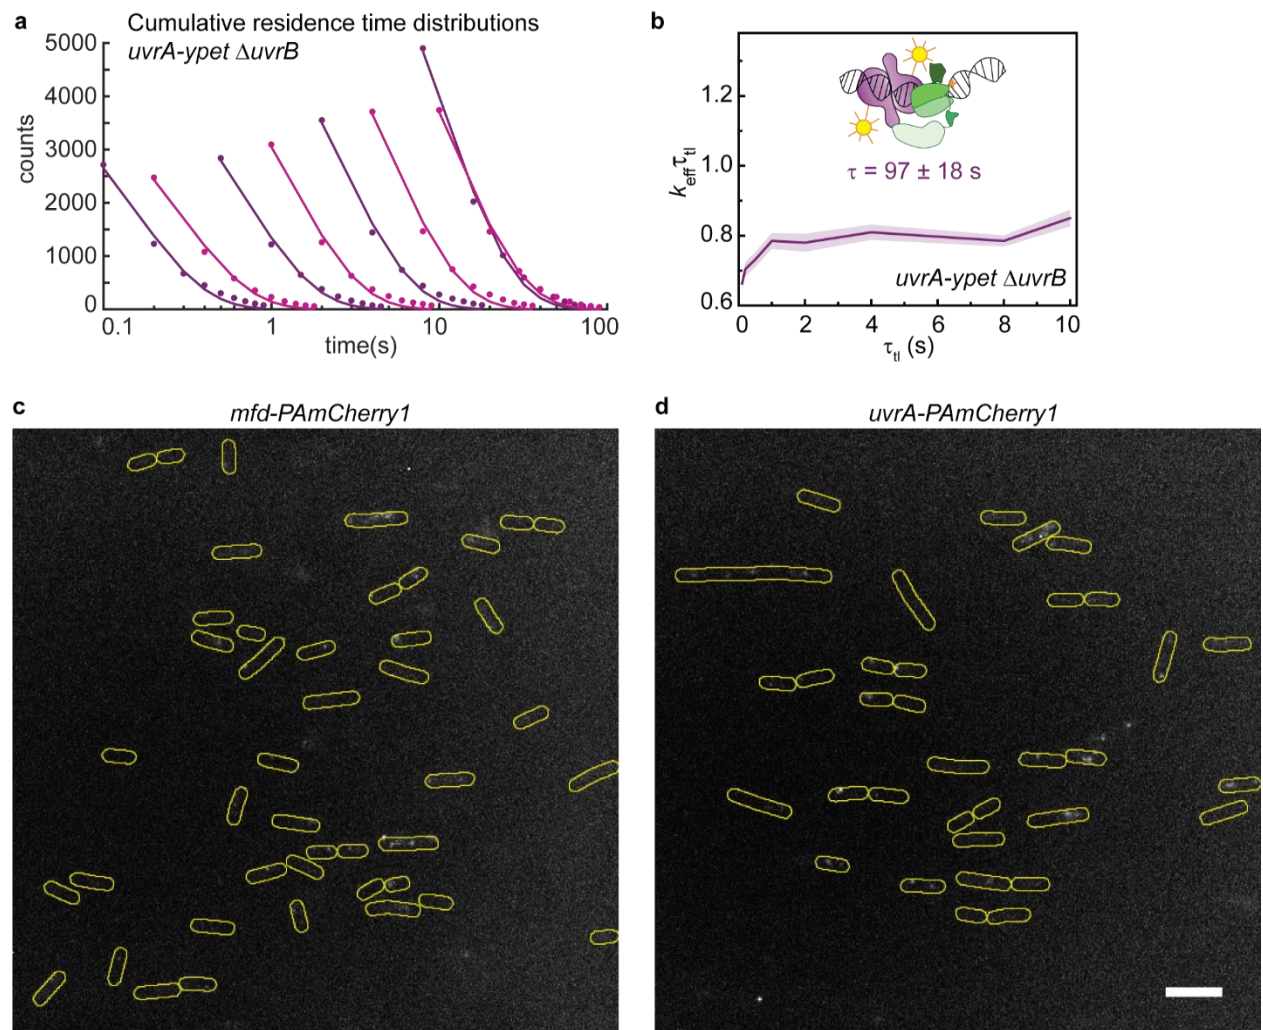

**Supplementary Figure 3:**

a. CRTDs (circles) obtained from interval imaging of UvrA-YPet in *uvrA-YPet ΔuvrB* cells. Lines are mono-exponential fits to CRTDs.

b. The  $k_{\text{eff}} \tau_{\text{tl}}$  plot obtained from fitting CRTDs of UvrA-YPet in *uvrA-YPet ΔuvrB* cells. Shaded error bands are standard deviations from ten bootstrapped samples. Cartoon (inset) illustrates the arrested complex formed by UvrA-YPet (purple) and Mfd (green) in *uvrA-YPet ΔuvrB* cells.

c. Maximum intensity projection of *mfd-PAmCherry1* cells obtained upon exposure to 405-nm and 568-nm light.

d. Maximum intensity projection of *uvrA-PAmCherry1* cells obtained upon exposure to 405-nm and 568-nm light.

Note the significantly fewer localizations obtained in these strains compared to the YPet tagged constructs (Figure 2) and reference 1. Cell outlines (yellow) are provided as guide to the eye. Scale bar represents 5  $\mu\text{m}$ . Source data are provided as a Source Data file.

Supplementary Figure 4:

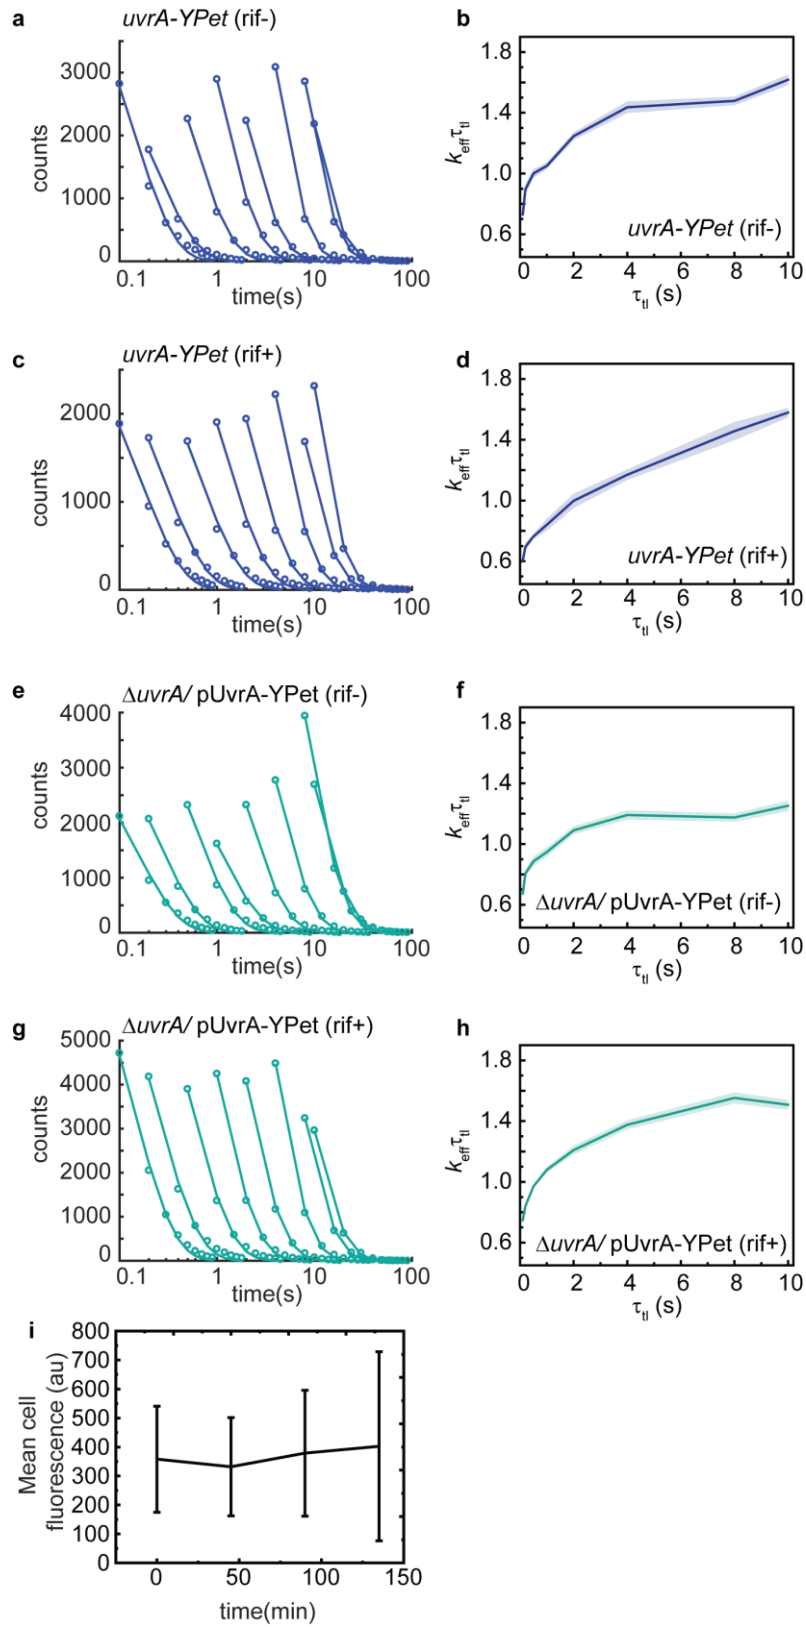



**Supplementary Figure 4:**

a. CRTDs (circles) obtained from interval imaging of UvrA-YPet in *uvrA-YPet* cells. Lines are mono-exponential fits to CRTDs.

b. The  $k_{\text{eff}} \tau_{\text{tl}}$  plot obtained from fitting CRTDs of UvrA-YPet in *uvrA-YPet* cells. Shaded error bands are standard deviations from ten bootstrapped samples.

c. CRTDs (circles) obtained from interval imaging of UvrA-YPet in rif-treated *uvrA-YPet* cells. Lines are mono-exponential fits to CRTDs.

d. The  $k_{\text{eff}} \tau_{\text{tl}}$  plot obtained from fitting CRTDs of UvrA-YPet in rif-treated *uvrA-YPet* cells. Shaded error bands are standard deviations from ten bootstrapped samples.

e. CRTDs (circles) obtained from interval imaging of UvrA-YPet in  $\Delta\text{uvrA}/\text{pUvrA-YPet}$  cells. Lines are mono-exponential fits to CRTDs.

f. The  $k_{\text{eff}} \tau_{\text{tl}}$  plot obtained from fitting CRTDs of UvrA-YPet in  $\Delta\text{uvrA}/\text{pUvrA-YPet}$  cells. Shaded error bands are standard deviations from ten bootstrapped samples.

g. CRTDs (circles) obtained from interval imaging of UvrA-YPet in rif-treated  $\Delta\text{uvrA}/\text{pUvrA-YPet}$  cells. Lines are mono-exponential fits to CRTDs.

h. The  $k_{\text{eff}} \tau_{\text{tl}}$  plot obtained from fitting CRTDs of UvrA-YPet in rif-treated  $\Delta\text{uvrA}/\text{pUvrA-YPet}$  cells. Shaded error bands are standard deviations from ten bootstrapped samples.

i. Mean pixel intensity (corrected for background) and standard deviation of all pixel intensities in cells (between 50 – 150 cells were analyzed at the indicated time points  $t = 0, 45, 90$  and  $135$  min) following 30 min rif treatment. Cell fluorescence remains constant within error of measurement.

Source data are provided as a Source Data file.

**Supplementary Figure 5:**

*uvrA-YPet Δmfd* (UV 20 Jm<sup>-2</sup>)

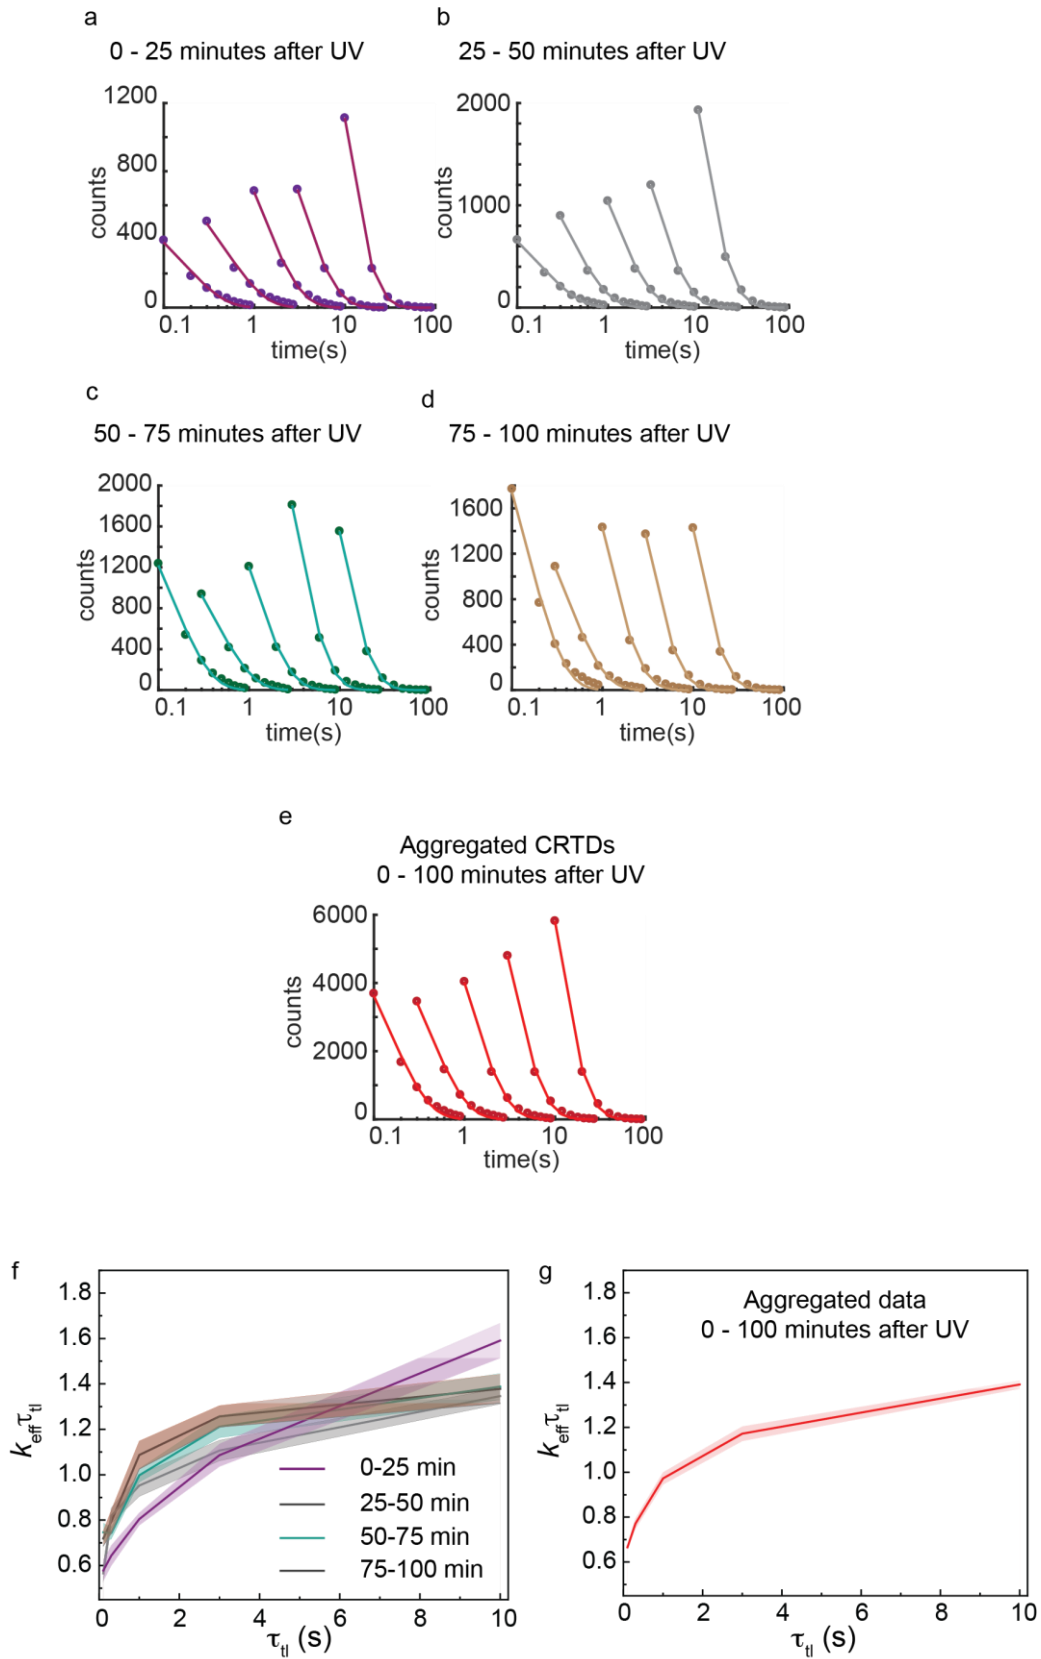

### Supplementary Figure 5:

a. CRTDs (circles) obtained from interval imaging of UvrA-YPet in *uvrA-YPet Δmfd* cells within the first 25 minutes following exposure to a  $20 \text{ Jm}^{-2}$  dose of 254-nm light. Lines are mono-exponential fits to CRTDs.

b. CRTDs (circles) obtained from interval imaging of UvrA-YPet in *uvrA-YPet Δmfd* cells 25-50 minutes following exposure to a  $20 \text{ Jm}^{-2}$  dose of 254-nm light. Lines are mono-exponential fits to CRTDs.

c. CRTDs (circles) obtained from interval imaging of UvrA-YPet in *uvrA-YPet Δmfd* cells 50-75 minutes following exposure to a  $20 \text{ Jm}^{-2}$  dose of 254-nm light. Lines are mono-exponential fits to CRTDs.

d. CRTDs (circles) obtained from interval imaging of UvrA-YPet in *uvrA-YPet Δmfd* cells 75-100 minutes following exposure to a  $20 \text{ Jm}^{-2}$  dose of 254-nm light. Lines are mono-exponential fits to CRTDs.

e. CRTDs (circles) obtained from interval imaging of UvrA-YPet in *uvrA-YPet Δmfd* cells within the first 100 minutes following exposure to a  $20 \text{ Jm}^{-2}$  dose of 254-nm light. Lines are mono-exponential fits to CRTDs.

f. The  $k_{\text{eff}} \tau_{\text{tl}}$  plots obtained from fitting CRTDs of UvrA-YPet in UV-treated *uvrA-YPet Δmfd* cells as a function of time following UV exposure. Shaded error bands are standard deviations from ten bootstrapped samples. Purple, 0-25 minutes; grey, 25-50 minutes; cyan, 50-75 minutes; brown, 75-100 minutes.

g. The  $k_{\text{eff}} \tau_{\text{tl}}$  plot obtained from fitting CRTDs of UvrA-YPet in UV-treated *uvrA-YPet Δmfd* cells within the first 100 minutes following UV exposure. Source data are provided as a Source Data file.

Supplementary Figure 6:

*uvrA*-YPet (UV 20 Jm<sup>-2</sup>)

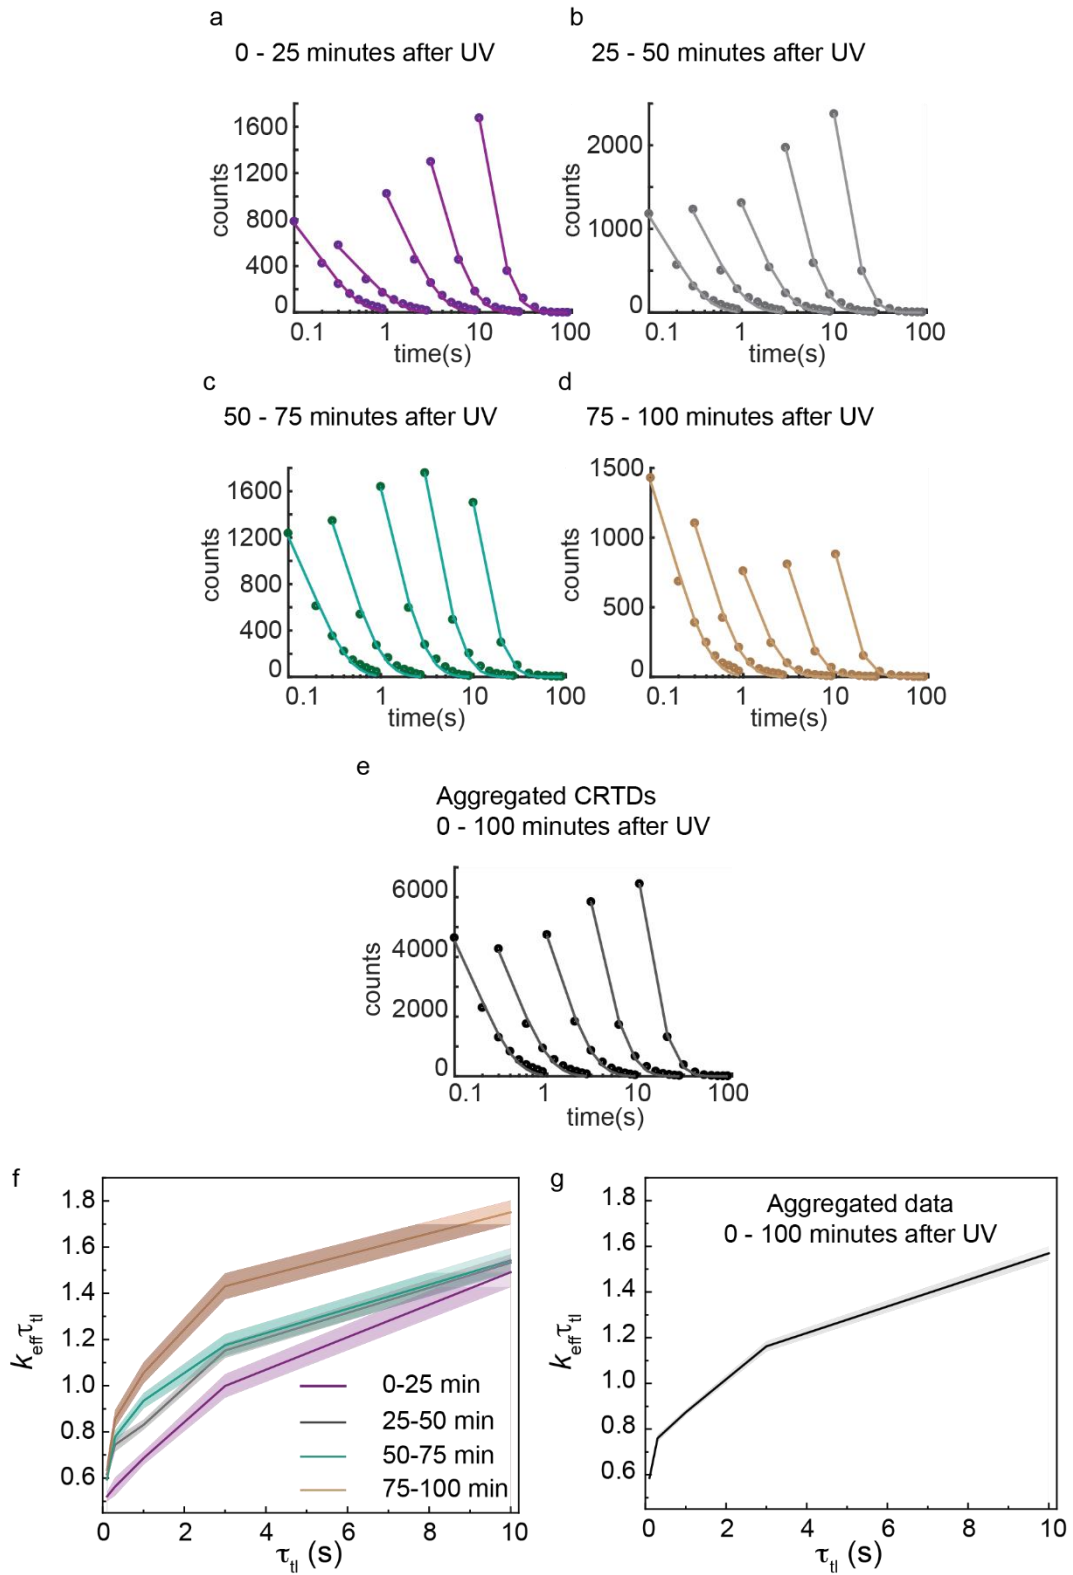

**Supplementary Figure 6:**

a. CRTDs (circles) obtained from interval imaging of UvrA-YPet in *uvrA-YPet* cells within the first 25 minutes following exposure to a  $20 \text{ Jm}^{-2}$  dose of 254-nm light. Lines are mono-exponential fits to CRTDs.

b. CRTDs (circles) obtained from interval imaging of UvrA-YPet in *uvrA-YPet* cells 25-50 minutes following exposure to a  $20 \text{ Jm}^{-2}$  dose of 254-nm light. Lines are mono-exponential fits to CRTDs.

c. CRTDs (circles) obtained from interval imaging of UvrA-YPet in *uvrA-YPet* cells 50-75 minutes following exposure to a  $20 \text{ Jm}^{-2}$  dose of 254-nm light. Lines are mono-exponential fits to CRTDs.

d. CRTDs (circles) obtained from interval imaging of UvrA-YPet in *uvrA-YPet* cells 75-100 minutes following exposure to a  $20 \text{ Jm}^{-2}$  dose of 254-nm light. Lines are mono-exponential fits to CRTDs.

e. CRTDs (circles) obtained from interval imaging of UvrA-YPet in *uvrA-YPet* cells within the first 100 minutes following exposure to a  $20 \text{ Jm}^{-2}$  dose of 254-nm light. Lines are mono-exponential fits to CRTDs.

f. The  $k_{\text{eff}} \tau_{\text{tl}}$  plots obtained from fitting CRTDs of UvrA-YPet in UV-treated *uvrA-YPet* cells as a function of time following UV exposure. Shaded error bands are standard deviations from ten bootstrapped samples. Purple, 0-25 minutes; grey, 25-50 minutes; cyan, 50-75 minutes; brown, 75-100 minutes.

g. The  $k_{\text{eff}} \tau_{\text{tl}}$  plot obtained from fitting CRTDs of UvrA-YPet in UV-treated *uvrA-YPet* cells within the first 100 minutes following UV exposure.

Source data are provided as a Source Data file.

Supplementary Figure 7:

*mfd-YPet* (UV 20 Jm<sup>-2</sup>)

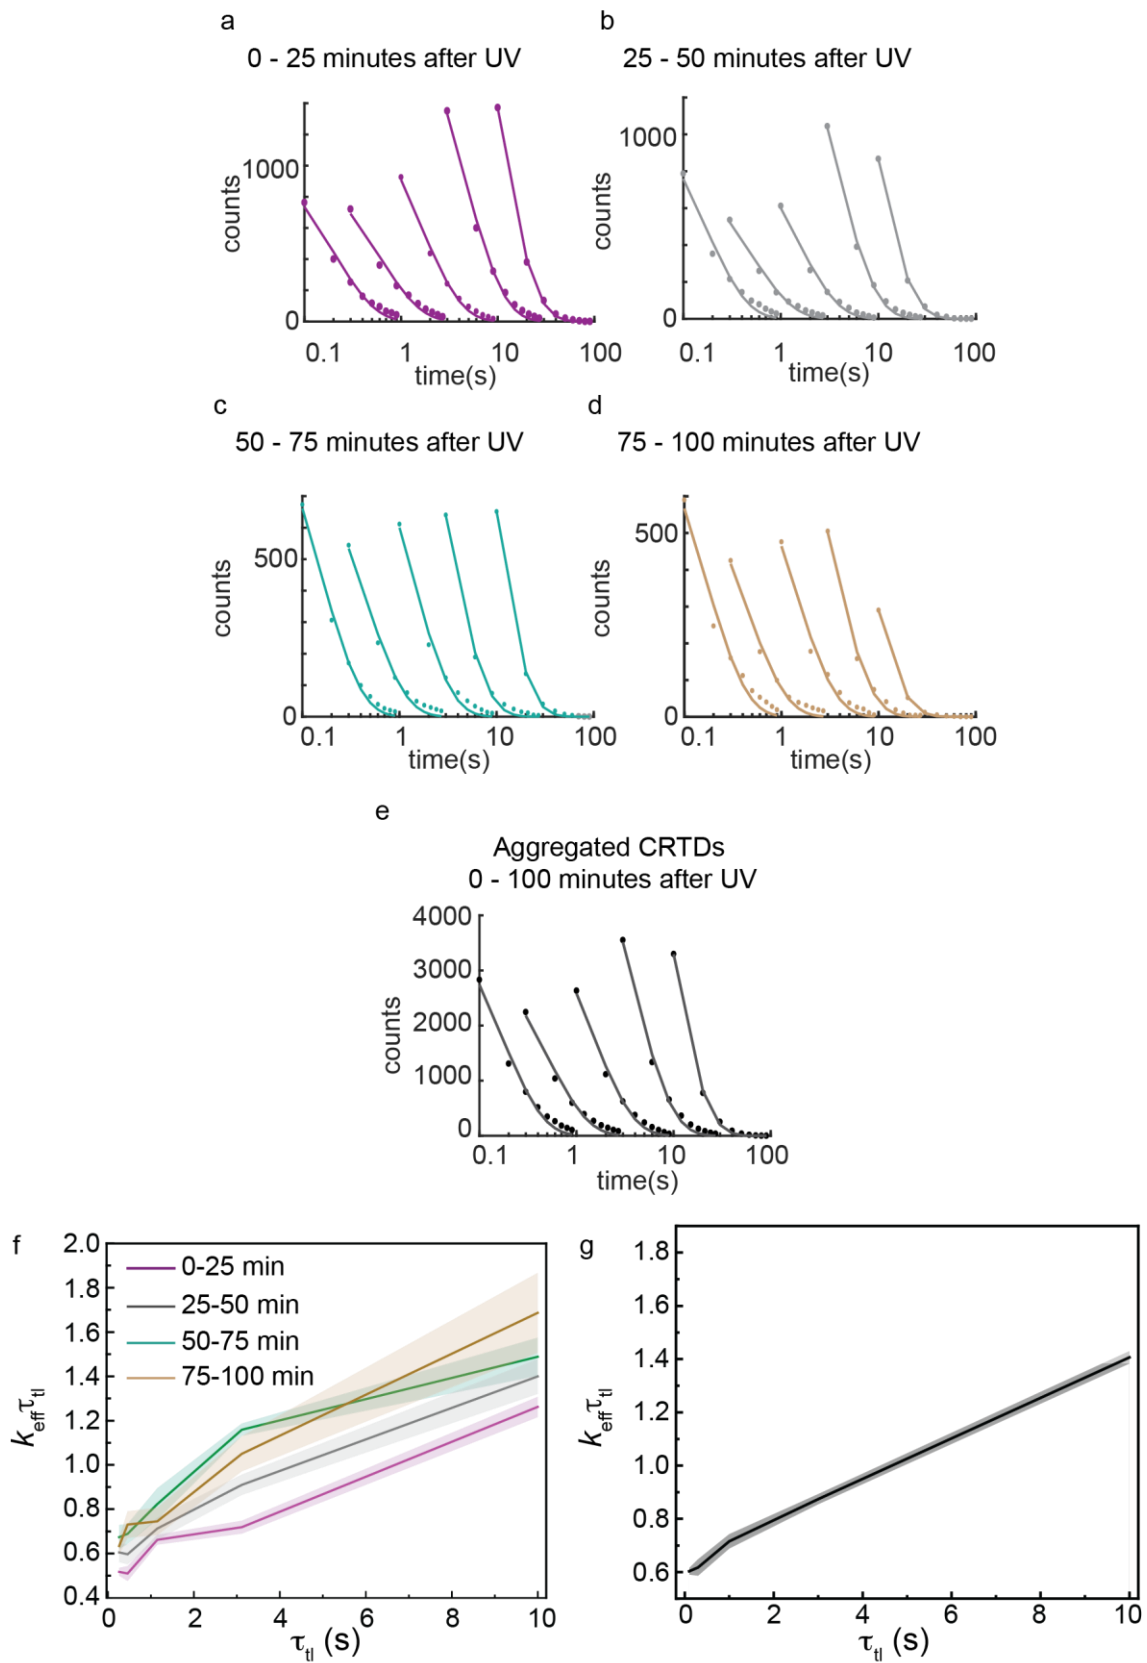

**Supplementary Figure 7:**

a. CRTDs (circles) obtained from interval imaging of Mfd-YPet in *mfd-YPet* cells within the first 25 minutes following exposure to a  $20 \text{ Jm}^{-2}$  dose of 254-nm light. Lines are mono-exponential fits to CRTDs.

b. CRTDs (circles) obtained from interval imaging of Mfd-YPet in *mfd-YPet* cells 25-50 minutes following exposure to a  $20 \text{ Jm}^{-2}$  dose of 254-nm light. Lines are mono-exponential fits to CRTDs.

c. CRTDs (circles) obtained from interval imaging of Mfd-YPet in *mfd-YPet* cells 50-75 minutes following exposure to a  $20 \text{ Jm}^{-2}$  dose of 254-nm light. Lines are mono-exponential fits to CRTDs.

d. CRTDs (circles) obtained from interval imaging of Mfd-YPet in *mfd-YPet* cells 75-100 minutes following exposure to a  $20 \text{ Jm}^{-2}$  dose of 254-nm light. Lines are mono-exponential fits to CRTDs.

e. CRTDs (circles) obtained from interval imaging of Mfd-YPet in *mfd-YPet* cells within the first 100 minutes following exposure to a  $20 \text{ Jm}^{-2}$  dose of 254-nm light. Lines are mono-exponential fits to CRTDs.

f. The  $k_{\text{eff}} \tau_{\text{el}}$  plots obtained from fitting CRTDs of Mfd-YPet in UV-treated *mfd-YPet* cells as a function of time following UV exposure. Shaded error bands are standard deviations from ten bootstrapped samples. Purple, 0-25 minutes; grey, 25-50 minutes; cyan, 50-75 minutes; brown, 75-100 minutes.

g. The  $k_{\text{eff}} \tau_{\text{el}}$  plot obtained from fitting CRTDs of Mfd-YPet in UV-treated *mfd-YPet* cells within the first 100 minutes following UV exposure.

Source data are provided as a Source Data file.

## Supplementary Tables

**Supplementary Table 1.** Bacterial strains. All strains are in *E. coli* K-12 MG1655 background.

| Strain/genotypes                                                                                 | Source/Technique                                             |
|--------------------------------------------------------------------------------------------------|--------------------------------------------------------------|
| <i>uvrA</i> -YPet                                                                                | This study/ $\lambda$ Red recombination                      |
| <i>uvrA</i> -PAmCherry1                                                                          | This study/ $\lambda$ Red recombination                      |
| <i>uvrA::kanR</i>                                                                                | This study                                                   |
| <i>uvrB::kanR</i>                                                                                | This study/ $\lambda$ Red recombination                      |
| <i>mfd::kanR</i>                                                                                 | This laboratory                                              |
| $\Delta$ <i>uvrA</i> $\Delta$ <i>mfd</i> $\Delta$ <i>uvrB</i>                                    | This study                                                   |
| $\Delta$ <i>uvrA</i> /pUvrA-YPet                                                                 | This study                                                   |
| $\Delta$ <i>uvrA</i> $\Delta$ <i>mfd</i> $\Delta$ <i>uvrB</i> /pUvrA-YPet                        | This study                                                   |
| $\Delta$ <i>uvrA</i> $\Delta$ <i>mfd</i> $\Delta$ <i>uvrB</i> /<br>pUvrA( $\Delta$ 131-250)-YPet | This study                                                   |
| <i>uvrA</i> -YPet $\Delta$ <i>mfd</i>                                                            | This study/ P1 transduction                                  |
| <i>uvrA</i> -YPet <i>uvrB</i> ( $\Delta$ $\beta$ HG)                                             | This study/ CRISPR-Cas9 assisted $\lambda$ Red recombination |
| <i>uvrA</i> -YPet <i>uvrB</i> ( $\Delta$ $\beta$ HG) $\Delta$ <i>mfd</i>                         | This study/ P1 transduction                                  |
| <i>uvrA</i> -YPet $\Delta$ <i>uvrB</i>                                                           | This study/ P1 transduction                                  |
| <i>mfd</i> -YPet                                                                                 | This laboratory                                              |
| <i>mfd</i> -PAmCherry1                                                                           | This study                                                   |



**Supplementary Table 2.** Oligonucleotides used for colony PCR and CRISPR-Cas9 assisted  $\lambda$  Red recombination.

| Oligo names                             | Sequence                                                                                                                                         |
|-----------------------------------------|--------------------------------------------------------------------------------------------------------------------------------------------------|
| UvrA_YPet_fw                            | TCGCG GAGTG CGAAG CATCA CACAC GGCAC GCTTC<br>CTTAA GCCGA TGCTG<br>TCGGCTGGCTCCGCTGCTGGTTCTGGCGAATTC ATG TCT<br>AAA GGT GAA GAA TTA TTC ACT GGT G |
| UvrA_rev                                | GCTGG TGCAA CTCTG AAAGG AAAAG GCCGC TCAGA<br>AAGCG GCCTT AACGA GAA GTT CCT ATT CTC TAG AAA<br>GTA TAG G                                          |
| UvrA_del_507_fw                         | CGGTA GCACC ATGCC ACCGG GCAAA AAAGC GTTTA<br>ATCCG GGAAA GGTGA cccttcgtcttcaagaattc                                                              |
| UvrA_del_507_rev                        | GCTGG TGCAA CTCTG AAAGG AAAAG GCCGC TCAGA<br>AAGCG GCCTT AACGA ggccacgatgcgtccggcgta                                                             |
| uvrA_del_seq_fw1                        | AACCTGGCCAGACATTGTTAC                                                                                                                            |
| uvrA_del_seq_rev1                       | CTGTTTGCATGGTGAAGA                                                                                                                               |
| UvrB_del_seq_fw                         | CCC AAC TCC TTC AGG TAG CG                                                                                                                       |
| UvrB_del_seq_rev                        | TAG GCC TGA TAA GCG TAG CG                                                                                                                       |
| UvrA_FWc                                | TGGGTACCGGGCCCGCGATTGTACCATTACCAATAG                                                                                                             |
| UvrAYPet_rev                            | AGCCAGCCGAagcgatcgcCAGCATCGGCTTAAGGA                                                                                                             |
| RecASZ2                                 | GTGGCGCCGCTCTA                                                                                                                                   |
| <i>Colony PCR for Cas9 verification</i> |                                                                                                                                                  |
| dCas9dL5_303_F                          | CAGACCGCCACAGTATCAAA                                                                                                                             |
| pCas9_6700_R                            | GGAAGGTATCCGACTGCTG                                                                                                                              |
| <i>Cloning of pCRISPR variants</i>      |                                                                                                                                                  |
| pCRISPR_UvrB_Y96A_S                     | AAA CCC TAC TAC GAC TAC TAT CAG CG                                                                                                               |
| pCRISPR_UvrB_Y96A_AS                    | AAA ACG CTG ATA GTA GTC GTA GTA GG                                                                                                               |
| <i>Recombineric ssDNA</i>               |                                                                                                                                                  |
| UvrB_ΔβHG_ssDNA                         | CAA TAT GTT CGT TAA CCG AGG CAT CTT TCT CAA TGA<br>AAG TGC CAT AAT AGT CGT AGT AGG AAA CGA AAT ATT<br>CCA CCG CGT TTT CCG                        |

**Supplementary Table 3.** Plasmids.

| Plasmid                       | Source/Technique                                                                                                                                                                                                                     |
|-------------------------------|--------------------------------------------------------------------------------------------------------------------------------------------------------------------------------------------------------------------------------------|
| pHH001 (pSC101-based)         | Plasmid backbone carrying a pSC101 origin, spectinomycin marker and expresses Mfd-YPet under the native <i>mfd</i> promoter <sup>1</sup> . pJM1071 used as a backbone was a generous gift from the Woodgate laboratory. <sup>2</sup> |
| pHH002                        | Plasmid backbone carrying a pSC101 origin, spectinomycin marker and expresses Mfd-YPet under the native <i>mfd</i> promoter. This lab <sup>1</sup> .                                                                                 |
| pYPet                         | This lab (synthetic gene obtained from GeneArt AG)                                                                                                                                                                                   |
| pUvrA-YPet                    | This study/Sub-cloning into pHH001                                                                                                                                                                                                   |
| pUvrA( $\Delta$ 131-250)-YPet | This study/Sub-cloning into pHH002                                                                                                                                                                                                   |
| pKD46                         | Cox lab <sup>3</sup>                                                                                                                                                                                                                 |
| pCas9                         | Addgene # 42876, Marraffini lab <sup>4</sup>                                                                                                                                                                                         |
| pCRISPR                       | Addgene # 42875, Marraffini lab <sup>4</sup>                                                                                                                                                                                         |
| pCRISPR-UvrB-Y96A             | This study/Sub-cloning into pCRISPR                                                                                                                                                                                                  |

**Supplementary Table 4: Sequences of plasmids and geneblocks used in this work**

| Plasmid | Sequence                                                                                                                                                                                                                                                                                                                                                                                                                                                                                                                                                                                                                                                                                                                                                                                                                                                                                                                                                                                                                                                                                                                                                                                                                                                                                                                                                                                                                                                                                                                                                                                                                                                                                                                                                                                                                                                                                                                                                                                                                                                                                                                                                                                                                                                                                                          |
|---------|-------------------------------------------------------------------------------------------------------------------------------------------------------------------------------------------------------------------------------------------------------------------------------------------------------------------------------------------------------------------------------------------------------------------------------------------------------------------------------------------------------------------------------------------------------------------------------------------------------------------------------------------------------------------------------------------------------------------------------------------------------------------------------------------------------------------------------------------------------------------------------------------------------------------------------------------------------------------------------------------------------------------------------------------------------------------------------------------------------------------------------------------------------------------------------------------------------------------------------------------------------------------------------------------------------------------------------------------------------------------------------------------------------------------------------------------------------------------------------------------------------------------------------------------------------------------------------------------------------------------------------------------------------------------------------------------------------------------------------------------------------------------------------------------------------------------------------------------------------------------------------------------------------------------------------------------------------------------------------------------------------------------------------------------------------------------------------------------------------------------------------------------------------------------------------------------------------------------------------------------------------------------------------------------------------------------|
| pEAW507 | <p>cgaggcccttcgtcttcaagaattcGAAGTTCCTATAGTTTCTAGAGAATAGGAACTTCgatcttt<br/> agaaaaactcatcgagcatcaaatgaaactgcaattattcatatcaggattatcaataccatattttgaaaag<br/> ccgtttctgtaatgaaggagaaaactcaccgaggcagttccataggatggcaagatcctgggatcggctcgcgatt<br/> ccgactcgtccaacatcaatacaacctattaattcccctcgtcaaaaataaggttatcaagtgagaaatcccat<br/> gagtgacgactgaatccggtgagaatggcaaaagcttatgcatttcttcagactgttcaacaggccagccatt<br/> acgctcgtcatcaaaatcactcgcacatcaacaaaccgttattcattcgtgattgcgcctgagcgagacgaaatacg<br/> cgatcgtgttaaaggacaattacaacaggaatcgaatgcaaccggcgcaggaactgccagcgcatcaac<br/> aatattttcacctgaatcaggatattcttaatacctggaatgctgtttccggggatcgagtggtgagtaacca<br/> tgcacatcaggagtagcggataaaatgcttgatggcgggaagaggcataaattccgtcagccagtttagtctgacc<br/> atctcatctgtaacatcattggcaacgctaccttgccatgtttcagaaacaactctggcgcacatcgggcttccatac<br/> aatcgatagattgtcgcacctgattgccgacattatcgcgagcccattataccatataaatcagcatccatgtt<br/> ggaatttaatcgggcctcgagcaagacgtttcccgttgaatatggctcataacacccttgtattactgtttatgta<br/> agcagacagttttattgttcatgatgatataatcttctgtgcaatgtaacatcagagattttgagacacaacgtg<br/> gctttccccccccccgatccccgggtaccgagctcgaatttcgaccaattcGAAGTTCCTATACTTTCTA<br/> GAGAATAGGAACTTCgggatcctctacgccggacgcacatcgtggccggcatcaccggcggccacaggtgcg<br/> gttctgctggcgcctatcgcggacatccaccgatggggaagatcgggctcggcactcgggctcatgagcgttgt<br/> ttcggcgtgggtatgggtggcaggccccgtggcgggggactgttgggcgccatctccttgcacacattccttgc<br/> ggcggcggtgctcaacggcctcaacctactactggcgtgcttccaatgaggagtcgcataaggagagcgtc<br/> gaccgatgcccttgagagcctcaaccagtcagctccttcgggtgggcggggcatgactatcgtcggcgcact<br/> tatgactgtctttatcatgcaactcgtaggacaggtgccggcagcgtctgggtcatttcggcgaggaccgctt<br/> tcgctggagcgcgacgatgatcggcctgtcgttgcggtattcggaatcttcacgccctcgtcaagccttctgca<br/> ctggtcccggccaaaacgtttcggcgagaagcaggccattatcggcggcatggcggccgacgcgctgggctacg<br/> tcttgctggcgttcgacgacgaggctggatggccttccccattatgattcttctcgttccggcggcatcgggatgc<br/> ccggttgaggccatgctgtccaggcaggtagatgacgaccatcaggacagcttcaaggatcgtcgcggctc<br/> ttaccagcctaactcgatcactggaccgctgatcgtcacggcgatttatgccgctcggcgagcacatggaacgg<br/> gttggcatggattgtaggcggccctatacctgtctgctccccggttgcgtcgcggtgcatggagccgggcca<br/> cctcgacctgaatggaagccggcggcacctcgttaacggattcaccactccaagaattggagccaatcaattcttg<br/> cggagaactgtgaatgcaaaccaacccttggcagaacatattccatcgcgtccgcatctccagcagccgcacg</p> |

|       |                                                                                                                                                                                                                                                                                                                                                                                                                                                                                                                                                                                                                                                                                                                                                                                                                                                                                                                                                                                                                                                                                                                                                                                                                                                                                                                                                                                                                                                                                                                                                                                                                                                                                                                                                                                                                                                                                                                                                                                           |
|-------|-------------------------------------------------------------------------------------------------------------------------------------------------------------------------------------------------------------------------------------------------------------------------------------------------------------------------------------------------------------------------------------------------------------------------------------------------------------------------------------------------------------------------------------------------------------------------------------------------------------------------------------------------------------------------------------------------------------------------------------------------------------------------------------------------------------------------------------------------------------------------------------------------------------------------------------------------------------------------------------------------------------------------------------------------------------------------------------------------------------------------------------------------------------------------------------------------------------------------------------------------------------------------------------------------------------------------------------------------------------------------------------------------------------------------------------------------------------------------------------------------------------------------------------------------------------------------------------------------------------------------------------------------------------------------------------------------------------------------------------------------------------------------------------------------------------------------------------------------------------------------------------------------------------------------------------------------------------------------------------------|
|       | <p> cggcgcatcgcgttgctggcgTTTTCCataggctccgccccctgacgagcatcacaAAAatcgacgctcaagtc<br/> agaggTggcgaaaccgacaggactataaagataaccaggcgtttcccctggaagctccctcgtgctctcctgt<br/> tccgacctgcccgttaccggatacctgtccgcctttcccttcgggaagcgtggcgctttctcatagctcacgctg<br/> taggtatctcagttcgggttaggtcgttcgctccaagctgggctgtgtgcacgaacccccgttcagcccaccgct<br/> gcgcttatccggtaaactatcgtcttgagtccaaccggtaagacacgacttatcgccactggcagcagccactgg<br/> taacaggattagcagagcgaggatgtagggcgtgtacagagttcttgaagtggcctaactacggctacac<br/> tagaaggacagtatttggatctgctgctgaagccagttaccttcggaaaaagagttggtagctcttgatccg<br/> gcaacaaaccaccgctggtagcgggtgtttttgtttgcaagcagcagattacgcgcagaaaaaaggatctc<br/> aagaagatccttgatctttctacggggtctgacgctcagtggaacgaaaactcacgttaagggttttggctatg<br/> agattatcaaaaaggatcttcacctagatcctttaaattaaatgaagtttaaatcaatctaaagtatatatga<br/> gtaaacttggctgacagttaccaatgcttaatcagtgaggcacctatctcagcgatctgtctatttcgttcatccat<br/> agttgcctgactccccgtcgtgtagataactacgatacgggagggcttaccatctggccccagtgctgcaatgata<br/> ccgagagaccacgctcaccggctccagatttatcagcaataaaccagccagccggaagggccgagcgcagaa<br/> gtggctctgcaactttatccgcctcatccagctctattaattgttccgggaagctagagtaagtagttccgagtta<br/> atagtttgcgcaacgttgttgcattgctgcaggcatcgtgggtgtcacgctcgtcgtttggatggcttcattcagctc<br/> cggttccaacgatcaaggcgagttacatgatccccatggtgtgcaaaaaagcggtagctccttcggctctccg<br/> atcgttgcagaagtaagttggccgagtggtatcactcatgggtatggcagcactgcataattctcttactgtcatg<br/> ccatccgtaagatgctttctgtgactggtagtactcaaccaagtattctgagaatagtgatgcggcgaccgag<br/> ttgctcttccggcgtcaaacgggataataaccgcccacatagcagaactttaaagtgctcatcattggaaaa<br/> cgttcttcggggcgaactctcaaggatcttaccgctgttgagatccagttcgatgaaccactcgtgcacccaa<br/> ctgatcttcagcatctttactttaccagcgtttctgggtgagcaaaaacaggaaggcaaaatgccgaaaaaag<br/> ggaataagggcgacacggaaatgttgaatactcactcttcttttcaatattattgaagcatttatcagggttat<br/> tgtctcatgagcggatacatatttgaatgtatttagaaaaataaacaataggggttccgcgcacatttcccgaa<br/> aagtgccacctgacgtctaagaaaccattattatcatgacattaacctataaaaaataggcgtatca </p> |
| pYPet | <p> CTAAATTGTAAGCGTAAATATTTTGTAAAATTCGCGTAAATTTTTGTAAATCAGCTC<br/> ATTTTTTAACCAATAGGCCGAAATCGGCAAAATCCCTTATAAATCAAAGAATAGACCG<br/> AGATAGGGTTGAGTGGCCGCTACAGGGCGCTCCATTGCGCATTGAGGCTGCGCAACT<br/> GTTGGGAAGGGCGTTTCGGTGCGGGCCTCTTCGCTATTACGCCAGCTGGCGAAAGGG<br/> GGATGTGCTGCAAGGCGATTAAGTTGGGTAACGCCAGGGTTTTCCAGTCACGACGTT<br/> GTAAACGACGGCCAGTGAGCGCGACGTAATACGACTCACTATAGGGCGAATTGGCG<br/> GAAGGCCGTCAAGGCCGCATATGTCTAAAGGTGAAGAATTACTGGTGTGTCC </p>                                                                                                                                                                                                                                                                                                                                                                                                                                                                                                                                                                                                                                                                                                                                                                                                                                                                                                                                                                                                                                                                                                                                                                                                                                                                                                                                                                                                                                                                                                                                   |

AATTTTGGTTGAATTAGATGGTGATGTTAATGGTCACAAATTTTCTGTCTCCGGTGAAG  
GTGAAGGTGATGCTACGTACGGTAAATTGACCTTAAAATTACTCTGTACTACTGGTAA  
ATTGCCAGTTCATGGCCAACCTTAGTCACTACTTTAGGTTATGGTGTTCAATGTTTTGC  
TAGATACCCAGATCATATGAAACAACATGACTTTTTCAAGTCTGCCATGCCAGAAGGT  
ATGTTCAAGAAAGAACTATTTTTTTCAAAGATGACGGTAACTACAAGACCAGAGCTGA  
AGTCAAGTTTGAAGGTGATACCTTAGTTAATAGAATCGAATTAAGGTATTGATTTTA  
AAGAAGATGGTAACATTTTAGGTCACAAATTGGAATACAATACTCTACAATGTT  
TACATCACTGCTGACAAACAAAAGAATGGTATCAAAGCTAACTTCAAATTAGACACA  
ACATTGAAGATGGTGGTGTTCATTAGCTGACCATTATCAACAAAATACTCCAATTGGT  
GATGGTCCAGTCTTGTTACCAGACAACCATTACTTATCCTATCAATCTGCCTTATTCAA  
GATCCAAACGAAAAGAGAGACCACATGGTCTTGTTAGAATTTTACTGCTGCTGGTA  
TTACCGAGGGTATGAATGAATTGTACAAAGAGCTCTAAGAAGTTCCTATAGTTTCTAG  
AGAATAGGAACTTCGATCTTTAGAAAACTCATCGAGCATCAAATGAACTGCAATTT  
ATTCATATCAGGATTATCAATACCATATTTTTGAAAAGCCGTTTCTGTAATGAAGGAG  
AAAACACCGAGGCAGTTCATAGGATGGCAAGATCCTGGTATCGGTCTGCGATTCC  
GACTCGTCCAACATCAATACAACCTATTAATTTCCCTCGTCAAAAATAAGGTTATCAA  
GTGAGAAATCACCATGAGTGACGACTGAATCCGGTGAGAATGGCAAAAGCTTATGCA  
TTTCTTTCCAGACTTGTTCAACAGGCCAGCCATTACGCTCGTCATCAAATCACTCGCAT  
CAACCAACCGTTATTCATTCGTGATTGCGCCTGAGCGAGACGAAATACGCGATCGCT  
GTTAAAAGGACAATTACAAACAGGAATCGAATGCAACCGGCGCAGGAACACTGCCAG  
CGCATCAACAATATTTTACCTGAATCAGGATATTCTTCTAATACCTGGAATGCTGTTTT  
CCCGGGGATCGCAGTGGTGAGTAACCATGCATCATCAGGAGTACGGATAAAATGCTT  
GATGGTCCGAAGAGGCATAAATTCCGTCAGCCAGTTTAGTCTGACCATCTCATCTGTA  
ACATCATTGGCAACGCTACCTTTGCCATGTTTCAGAAACAATACTGCGCATCGGGCTT  
CCCATAAATCGATAGATTGTCGCACCTGATTGCCCGACATTATCGCGAGCCATTTAT  
ACCCATATAAATCAGCATCCATGTTGGAATTTAATCGCGGCCTCGAGCAAGACGTTTCC  
CGTTGAATATGGCTCATAACACCCCTTGTTACTGTTTATGTAAGCAGACAGTTTTATT  
GTTTCATGATGATATTTTTATCTTGCAATGTAACATCAGAGATTTTGGAGACACAAC  
GTGGCTTTCCCCCCCCCGATCCCCGGGTACCGAGCTCGAATTTGACCAATTCGAA  
GTTCTATACTTTCTAGAGAATAGGAACTTCTGGGCCTCATGGGCCTTCCGCTCACTG  
CCCGCTTTCCAGTCGGGAAACCTGTCGTGCCAGCTGCATTAACATGGTCATAGCTGTTT

CCTTGCGTATTGGGCGCTCTCCGCTTCTCGCTCACTGACTCGCTGCGCTCGGTCGTT  
GGGTAAAGCCTGGGGTGCCTAATGAGCAAAAGGCCAGCAAAAGGCCAGGAACCGTA  
AAAAGGCCGCGTTGCTGGCGTTTTTTCATAGGCTCCGCCCCCTGACGAGCATCACAA  
AAATCGACGCTCAAGTCAGAGGTGGCGAAACCCGACAGGACTATAAAGATAACCAGGC  
GTTTCCCCCTGGAAGCTCCCTCGTGCCTCTCCTGTTCCGACCCTGCCGTTACCGGAT  
ACCTGTCCGCCTTCTCCCTTCGGGAAGCGTGGCGCTTTCATAGCTCACGCTGTAGG  
TATCTCAGTTCGGTGTAGGTCGTTGCTCCAAGCTGGGCTGTGTGCACGAACCCCCGT  
TCAGCCCGACCGCTGCGCCTTATCCGGTAACTATCGTCTTGAGTCCAACCCGTAAGAC  
ACGACTTATCGCCACTGGCAGCAGCCACTGGTAACAGGATTAGCAGAGCGAGGTATG  
TAGGCGGTGCTACAGAGTTCCTGAAGTGGTGGCCTAACTACGGCTACACTAGAAGAAC  
AGTATTTGGTATCTGCGCTCTGCTGAAGCCAGTTACCTTCGGAAAAAGAGTTGGTAGC  
TCTTGATCCGGCAAACAAACCACCGCTGGTAGCGGTGGTTTTTTTTGTTTGAAGCAGCA  
GATTACGCGCAGAAAAAAGGATCTCAAGAAGATCCTTTGATCTTTTCTACGGGGTCT  
GACGCTCAGTGGAACGAAAACCTCACGTTAAGGGATTTTGGTCATGAGATTATCAAAAA  
GGATCTTCACCTAGATCCTTTAAATTAATAAATGAAGTTTTAAATCAATCTAAAGTATAT  
ATGAGTAACTTGGTCTGACAGTTACCAATGCTTAATCAGTGAGGCACCTATCTCAGC  
GATCTGTCTATTTGTTTCATCCATAGTTGCCTGACTCCCCGTCGTGTAGATAACTACGAT  
ACGGGAGGGCTTACCATCTGGCCCCAGTGCTGCAATGATACCGCGAGAACCACGCTCA  
CCGGCTCCAGATTTATCAGCAATAAACCAGCCAGCCGGAAGGGCCGAGCGCAGAAGT  
GGTCTGCAACTTTATCCGCCTCCATCCAGTCTATTAATTGTTGCCGGGAAGCTAGAGT  
AAGTAGTTCGCCAGTTAATAGTTTGCGCAACGTTGTTGCCATTGCTACAGGCATCGTG  
GTGTCACGCTCGTCGTTTGGTATGGCTTCATTAGCTCCGTTCCCAACGATCAAGGCG  
AGTTACATGATCCCCATGTTGTGCAAAAAAGCGGTTAGCTCCTTCGGTCTCCGATCG  
TTGTCAGAAGTAAGTTGGCCGAGTGTTATCACTCATGGTTATGGCAGCACTGCATAA  
TTCTCTTACTGTCATGCCATCCGTAAGATGCTTTTCTGTGACTGGTGAGTACTCAACCAA  
GTCATTCTGAGAATAGTGTATGCGGCGACCGAGTTGCTCTTGCCCGCGTCAATACGG  
GATAATACCGCGCCACATAGCAGAACTTTAAAAGTGCTCATCATTGGAAAACGTTCTTC  
GGGGCGAAAACCTCTCAAGGATCTTACCGCTGTTGAGATCCAGTTCGATGTAACCCACT  
CGTGCAACCAACTGATCTTCAGCATCTTTACTTTACCAGCGTTTCTGGGTGAGCAAA  
AACAGGAAGGCAAAATGCCGCAAAAAGGGAATAAGGGCGACACGGAAATGTTGAA  
TACTCATACTCTCCTTTTTCAATATTATTGAAGCATTTATCAGGGTTATTGTCTCATGAG

|                                     |                                                                                                                                                                                                                                                                                                                                                                                                                                                                                                                                                                                                                                                                                                                                                                                                                                                                                                                                                                                                                                                                                                                                                                                                                                                                                                                                                                                                                                                                                                                                                                                                                                                                                                                                                                                                                                                               |
|-------------------------------------|---------------------------------------------------------------------------------------------------------------------------------------------------------------------------------------------------------------------------------------------------------------------------------------------------------------------------------------------------------------------------------------------------------------------------------------------------------------------------------------------------------------------------------------------------------------------------------------------------------------------------------------------------------------------------------------------------------------------------------------------------------------------------------------------------------------------------------------------------------------------------------------------------------------------------------------------------------------------------------------------------------------------------------------------------------------------------------------------------------------------------------------------------------------------------------------------------------------------------------------------------------------------------------------------------------------------------------------------------------------------------------------------------------------------------------------------------------------------------------------------------------------------------------------------------------------------------------------------------------------------------------------------------------------------------------------------------------------------------------------------------------------------------------------------------------------------------------------------------------------|
|                                     | CGGATACATATTTGAATGTATTTAGAAAAATAAACAAATAGGGGTTCCGCGCACATTTCCCGAAAAGTGCCAC                                                                                                                                                                                                                                                                                                                                                                                                                                                                                                                                                                                                                                                                                                                                                                                                                                                                                                                                                                                                                                                                                                                                                                                                                                                                                                                                                                                                                                                                                                                                                                                                                                                                                                                                                                                     |
| UvrA<br>d131_250<br>(gene<br>block) | TGGGTACCGGGCCCCGCGATTGTACCATTACCAATAGCGCTTTTACTATGTTGTGACCTC<br>GGTTCGGGAAACAAACCTGGCCAGACATTGTTACACAACACTCCGGGTAATGCATTC<br>CAATACTGTATATTCATTCAAGTCAATTTGTGTCATAATTAACCGTTTGTGATCGCCGGT<br>AGCACCATGCCACCGGGCAAAAAGCGTTTAATCCGGGAAAGGTGAATGGATAAGAT<br>CGAAGTTCGGGGCGCCCGCACCCATAATCTCAAAAACATCAACCTCGTTATCCCCCGCG<br>ACAAGCTCATTGTCGTGACCGGGCTTTCTGGGTTCTGGCAAATCCTCGCTCGCTTTCGAC<br>ACCTTATATGCCGAAGGGCAGCGCCGTTACGTTGAATCCCTTCCGCCTACGCGCGGC<br>AGTTTCTGTCACTGATGGAAAAGCCGGACGTGATCATATTGAGGGGCTTTCTCCTGC<br>CATCTCAATTGAGCAGAAATCGACGTCTATAACCCGCGTTCTACGGTGGGGACAATC<br>ACCGAAATCCACGACTATTTGCGTTTGTATTTCGCCCGCGTTGGCGAGCCGCGCTGTCC<br>GGACCACGACGTCCCGCTGGCGGCGCAAGGCTTCGCCTGCCCAATTTGCGGCTACAGT<br>ATGCGTGAAGTGGAGCCGCGACTGTTTTCGTTTAAACAACCCGGCGGGGGCCTGCCCGA<br>CCTGCGACGGCCTTGCGGTACAGCAATATTTGATCCTGATCGAGTGATCCAGAATCC<br>GGAACTGTCGCTGGCTGGTGGTGCATCCGTGGCTGGGATCGCCGCAACTTCTATTAT<br>TTCCAGATGCTGAAATCGCTGGCAGATCACTATAAGTTTCGACGTGGAAGCGCCGTGGG<br>GCAGCCTGAGCGCGAACGTGCATAAAGTGGTGTGTACGGTTCTGGCAAAGAAAACA<br>TTGAATCAAATACATGAACGATCGTGGCGATACCTCCATTCGTCGTATCCGTTCGAA<br>GGCGTGCTGCATAATATGGAGCGCCGCTATAAAGAGACGGAATCCAGCGCGGTACGC<br>GAAGAATTAGCCAAGTTTATCAGTAATCGTCCGTGCGCCAGCTGCGAAGGGACGCGTC<br>TGCGTCGGGAAGCGCGCCACGTGTATGTCGAGAATACGCCGCTGCCTGCTATCTCCGA<br>CATGAGCATTGGTCATGCGATGGAATTCTTCAACAATCTCAAACCTCGCAGGTCAGCGG<br>GCGAAGATTGCAGAAAAAATCCTTAAAGAGATCGGCGATCGTCTGAAATTCCTCGTTA<br>ACGTCGGCCTGAATTACCTGACGCTTTCCCGCTCGGCAGAAACGCTTTCTGGCGGTGA<br>AGCACAGCGTATCCGTCTGGCGAGCCAGATTGGTGCGGGCCTGGTTGGCGTTATGTAC<br>GTGCTGGACGAGCCGTCTATCGGCCTGCACCAGCGTGATAACGAGCGCCTGTTGGGT<br>ACGCTTATCCATCTGCGCGATCTCGGTAATACCGTGATTGTGGTGGAGCACGACGAAG<br>ACGCAATTCGCGCCGCTGACCATGTGATCGACATTGGCCCGGGCGCAGGTGTTACCGG<br>CGGTGAAGTGGTCGCGAAGGTCCGCTGGAAGCGATTATGGCGGTGCCGGAGTCGTT<br>GACCGGGCAGTACATGAGCGGCAAACGCAAGATTGAAGTGCCGAAGAAACGCGTTCC |

GGCGAATCCGGAAAAAGTGCTGAAGCTGACAGGCGCACGCGGCAACAACCTGAAGG  
ACGTGACGCTGACGCTGCCGGTGGGTCTGTTTACCTGCATCACCGGGGTTTCAGGTTT  
CGGTAAATCGACGCTGATTAACGACACACTGTTCCCGATTGCCCAACGCCAGTTGAAT  
GGGGCGACCATCGCCGAACCAGCACCGTATCGCGATATTCAGGGGCTGGAGCATTTT  
GATAAAGTGATCGATATCGACCAAAGCCCAATTGGTCGTA CTCCACGTTCTAACCCGG  
CGACCTATACCGGCGTGTTTACGCCTGTGCGCGAACTGTTTGCGGGCGTACCGGAATC  
CCGTGCGCGCGGCTATACGCCGGGACGTTTCAGCTTTAACGTTTCGTGGCGGACGCTGC  
GAGGCCTGTCAGGGCGATGGCGTGATCAAAGTGAGATGCACTTCCTGCCGGATATC  
TACGTGCCGTGCGACCAGTGCAAAGGTAAACGCTATAACCGTGAAACGCTGGAGATT  
AAGTACAAAGGCAAACCATCCACGAAGTGCTGGATATGACCATCGAAGAGGCGCGT  
GAGTTCTTTGATGCCGTACCTGCACTGGCGCGTAAGCTGCAAACGTTGATGGACGTTG  
GCCTGACGTACATTCGACTGGGGCAGTCCGCAACCACCCTTTCAGGCGGTGAAGCCCA  
GCGCGTGAAGCTGGCGCGTGAAGTGTCAAACGCGGCACCGGGCAGACGCTGTATAT  
TCTCGACGAGCCGACCACCGGTCTGCACTTCGCCGATATTCAGCAACTGCTCGACGTAC  
TGCATAAACTGCGCGATCAGGGCAACACCATTGTGGTGATTGAGCACAATCTCGACGT  
GATCAAACCGCTGACTGGATTGTGACCTGGGACCAGAAGGCGGCAGTGGTGGCGG  
CGAGATCCTCGTCTCCGGTACGCCAGAAACCGTCGCGGAGTGCGAAGCATCACACACG  
GCACGCTTCCTTAAGCCGATGCTGGCGATCGCTTCGGCTGGCTCCGCTGCAGGTTCTG  
GCGAATTCGGGTAATGATTCAGTTCTAGAGCGGCCGCACTAA



## Supplementary Notes

### Supplementary Note 1

The chromosomal fusions of *uvrA-YPet* and *uvrA-PAmCherry1* and *mfd-PAmCherry1* were created using  $\lambda$  Red recombination as previously described and the primers indicated in supplementary table 2<sup>3</sup>. Sequence verified recombinant strains carrying Mfd-PAmCherry1 and UvrA-PAmCherry1 were then screened by imaging at the single-cell level. Unlike their YPet tagged counterparts, the PAmCherry1 labelled proteins were poorly expressed in MG1655 (Supplementary Fig. 3).

### Supplementary Note 2: Copy numbers of UvrA after SOS induction

UvrA copy numbers have been suggested to increase from 25 to 250 copies per cell after SOS induction<sup>5</sup>. We note that since the experimental conditions associated with these measurements are not available in the published literature, we are unable to effectively compare our measurements with these numbers. Nevertheless, the basal levels and the exact extent of fold-induction after SOS induction may depend on the nature and dosage of the genotoxin, as well as growth conditions such as medium and temperature. Consistent with this argument, the copy numbers of UvrA were found to rise six-fold within 40 minutes of UV exposure ( $40 \text{ Jm}^{-2}$ ) in cells growing at 37 °C in previous work<sup>6</sup>.

## Supplementary References

- 1 Ho HN, van Oijen AM, Ghodke H. The transcription-repair coupling factor Mfd associates with RNA polymerase in the absence of exogenous damage. *Nat Commun* **9**, 1570 (2018).
- 2 Churchward G, Belin D, Nagamine Y. A pSC101-derived plasmid which shows no sequence homology to other commonly used cloning vectors. *Gene* **31**, 165-171 (1984).
- 3 Datsenko KA, Wanner BL. One-step inactivation of chromosomal genes in *Escherichia coli* K-12 using PCR products. *Proc Natl Acad Sci U S A* **97**, 6640-6645 (2000).
- 4 Jiang W, Bikard D, Cox D, Zhang F, Marraffini LA. RNA-guided editing of bacterial genomes using CRISPR-Cas systems. *Nat Biotechnol* **31**, 233-239 (2013).
- 5 Selby, C. P. & Sancar, A. Structure and function of the (A)BC excinuclease of *Escherichia coli*. *Mutat Res* **236**, 203-211 (1990).
- 6 Crowley DJ, Hanawalt PC. Induction of the SOS Response Increases the Efficiency of Global Nucleotide Excision Repair of Cyclobutane Pyrimidine Dimers, but Not 6-4 Photoproducts, in UV-Irradiated *Escherichia coli*. *J Bacteriol* **180**, 3345-3352 (1998).
