# Supplementary material for: Single-molecule live-cell imaging visualizes parallel pathways of prokaryotic nucleotide excision repair
Source: PubMed Central journal article supplement (PMC7083872; doi:10.1038/s41467-020-15179-y), 2020-03-20
Supplement: 41467_2020_15179_MOESM2_ESM.pdf [file 41467_2020_15179_MOESM2_ESM.pdf]

## Description of Additional Supplementary Files

File Name: Supplementary Movie 1

Description: **Imaging of UvrA-YPet cells.** Movie showing UvrA-YPet cells immobilized in a flow cell and exposed to 514 nm laser light. Acquisition is collected in two phases. Phase I consists of 50 frames of 100 ms each. Phase II consists of 100 frames of 100 ms each. Frames in phase II are collected by introduction of a dark interval. Here, example video shows continuous acquisition in both phases. Scale bar represents 5  $\mu\text{m}$ .
